# Supplementary material for: The crystallographic phase transition for a ferric thiosemicarbazone spin crossover complex studied by X-ray powder diffraction
Source: Royal Society of Chemistry journal article supplement (doi:10.1039/b605326b), 2006-01-01
Supplement: b605326b.pdf [file b605326b.pdf]

**The crystallographic phase transition for a ferric  
thiosemicarbazone spin crossover complex studied by X-Ray  
powder diffraction.**

Sébastien Floquet<sup>\*,a,b</sup>, Nathalie Guillou<sup>b</sup>, Philippe Négrier<sup>c</sup>, Eric Rivière<sup>a</sup>  
and Marie-Laure Boillot<sup>\*,a</sup>

<sup>a</sup> ICMMO, Equipe de Chimie Inorganique, UMR 8182, Université Paris-Sud, 91400 Orsay,  
France. E-mail : [mboillot@icmo.u-psud.fr](mailto:mboillot@icmo.u-psud.fr)

<sup>b</sup> Institut Lavoisier de Versailles, UMR 8180, Université de Versailles, 45 avenue des Etats-  
Unis 78035 Versailles, France. E-mail : [sebastien.floquet@uvsq.fr](mailto:sebastien.floquet@uvsq.fr)

<sup>c</sup> Centre de Physique Moléculaire Optique et Hertzienne, UMR 5798, Université Bordeaux I,  
Talence, France.

*Supplementary Data*

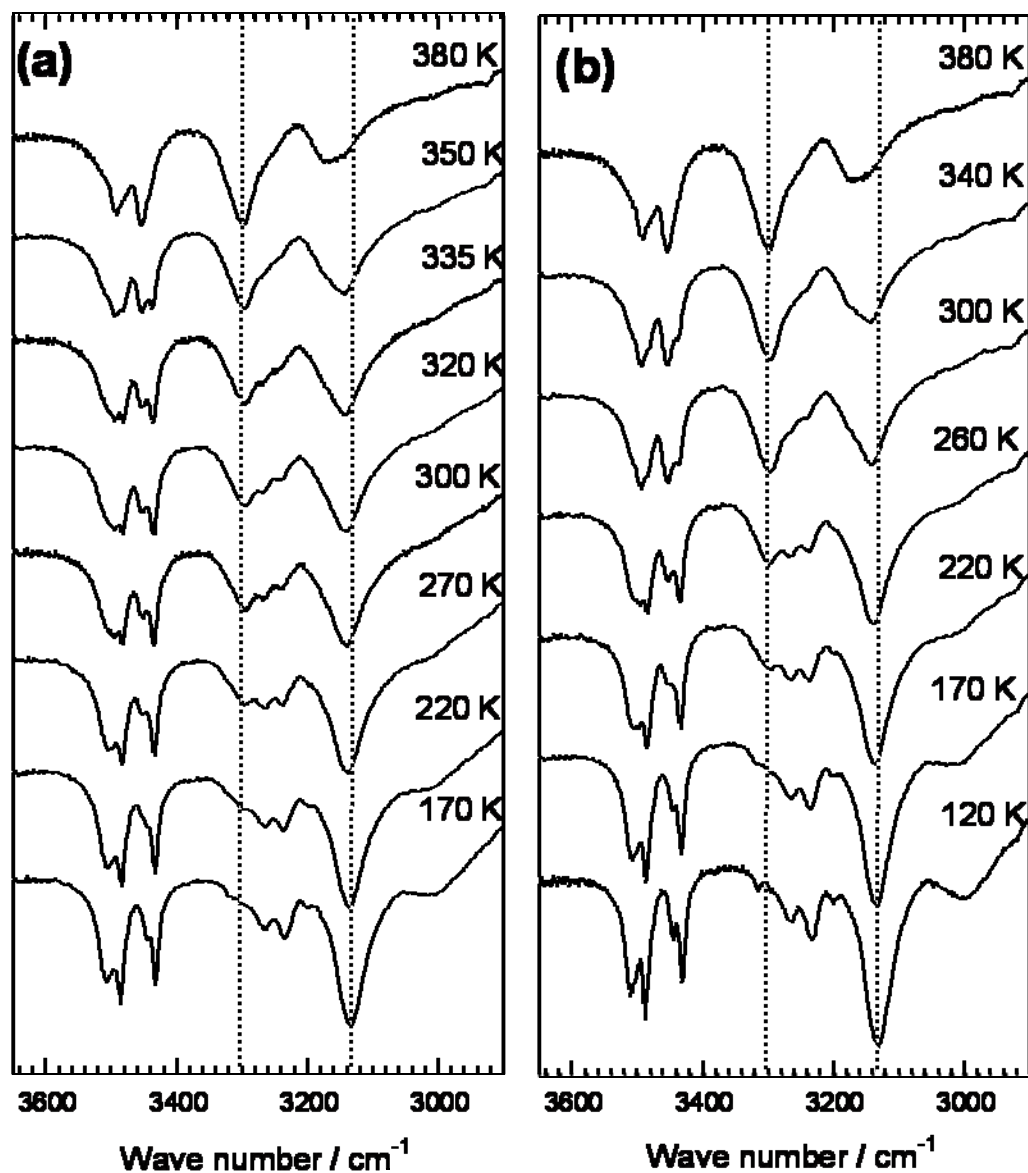

Figure S1 : IR spectra of compound  $\text{Li}[\text{Fe}(\text{5BrThsa})_2] \cdot \text{H}_2\text{O}$  in Heating mode from 170 to 380 K (a) and in cooling mode from 380 to 120 K (b) (From Ref. S1).

Dotted lines are only guides for eyes.

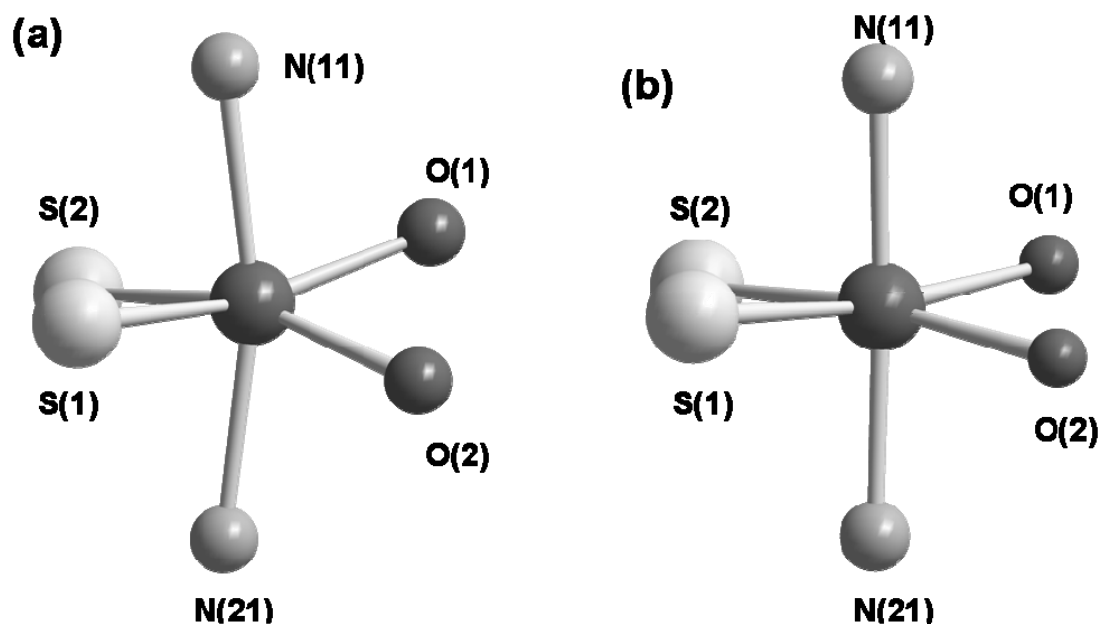

Figure S2 : Distortion of  $[\text{FeN}_2\text{O}_2\text{S}_2]$  core in HS (a) and LS (b) phases.

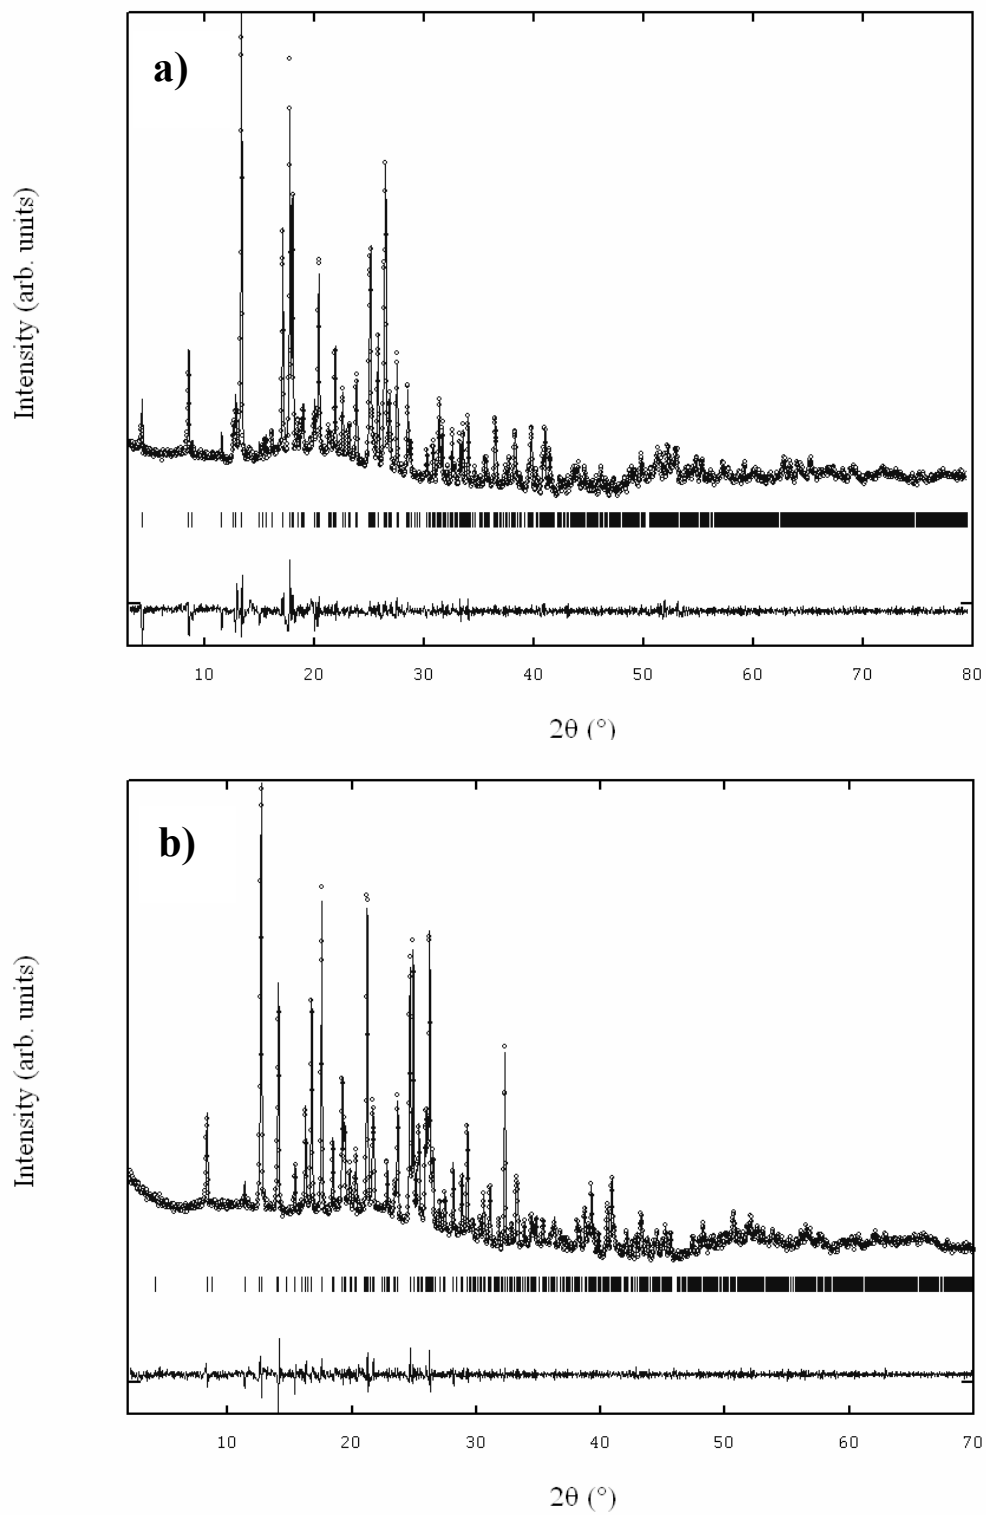

Figure S3 : Structureless whole pattern profile refinements for the LS phase (a) and the HS phase (b).

**Table S1.** Selected angles of LS and HS ferric thiosemicarbazone complexes. Labels are given in agreement with those used for  $\text{Li}[\text{Fe}(\text{5BrThsa})_2]\cdot\text{H}_2\text{O}$ .

| Compounds    | $\text{Cs}[\text{Fe}(\text{Thsa})_2]$<br>Ref. S2 | $\text{NH}_4[\text{Fe}(\text{5BrThsa})_2]$<br>Ref. S3 | $\text{NH}_4[\text{Fe}(\text{5ClThsa})_2]$<br>Ref. S4 | $\text{K}[\text{Fe}(\text{3,5Cl}_2\text{Thsa})_2]$<br>,1.5 $\text{H}_2\text{O}$ . Ref. S5<br>Site Fe1 | $\text{K}[\text{Fe}(\text{3,5Cl}_2\text{Thsa})_2]$<br>,1.5 $\text{H}_2\text{O}$ Ref. S5<br>Site Fe2 |
|--------------|--------------------------------------------------|-------------------------------------------------------|-------------------------------------------------------|-------------------------------------------------------------------------------------------------------|-----------------------------------------------------------------------------------------------------|
| T/K          | 298 K                                            | 300 K                                                 | 135 K                                                 | 103 K                                                                                                 | 103 K                                                                                               |
| Spin State   | HS                                               | LS                                                    | LS                                                    | LS                                                                                                    | Almost LS                                                                                           |
| O(1)FeO(2)   | 84.3(5)                                          | 86.4(3)                                               | 87.3                                                  | 86.6(6)                                                                                               | 87.1(5)                                                                                             |
| O(1)FeS(2)   | 90.9(4)                                          | -                                                     | 89.6                                                  | 91.8(7)                                                                                               | 92.4(4)                                                                                             |
| O(1)FeN(11)  | 86.8(5)                                          | 89.7(3)                                               | 88.9                                                  | 91.8(7)                                                                                               | 90.3(6)                                                                                             |
| O(1)FeN(21)  | 109.8(5)                                         | 93.3(3)                                               | 93.4                                                  | 89.6(6)                                                                                               | 90.5(6)                                                                                             |
| O(2)FeS(1)   | 89.4(4)                                          | 89.9(2)                                               | 86.6                                                  | 91.3(5)                                                                                               | 93.1(5)                                                                                             |
| O(2)FeN(11)  | 108.0(5)                                         | -                                                     | 93.4                                                  | 89.2(7)                                                                                               | 90.8(6)                                                                                             |
| O(2)FeN(21)  | 85.6(5)                                          | -                                                     | 88.9                                                  | 94.6(7)                                                                                               | 90.7(6)                                                                                             |
| S(1)FeS(2)   | 100.3(2)                                         | 93.8(1)                                               | 93.5                                                  | 90.3(2)                                                                                               | 88.0(2)                                                                                             |
| S(1)FeN(11)  | 78.4(4)                                          | 85.8(2)                                               | 86.0                                                  | 83.9(6)                                                                                               | 83.7(5)                                                                                             |
| S(1)FeN(21)  | 87.2(4)                                          | 91.4(2)                                               | 91.7                                                  | 94.9(5)                                                                                               | 95.5(5)                                                                                             |
| S(2)FeN(11)  | 89.9(4)                                          | -                                                     | 91.7                                                  | 91.4(4)                                                                                               | 94.9(5)                                                                                             |
| S(2)FeN(21)  | 78.9(4)                                          | -                                                     | 86.0                                                  | 84.9(5)                                                                                               | 83.6(5)                                                                                             |
| O(1)FeS(1)   | 161.3(4)                                         | 176.2(2)                                              | 176.8                                                 | 175.2(5)                                                                                              | 174.0(5)                                                                                            |
| O(2)FeS(2)   | 161.2(4)                                         | -                                                     | 176.8                                                 | 178.4(4)                                                                                              | 174.2(4)                                                                                            |
| N(11)FeN(21) | 159.9(5)                                         | 175.9(3)                                              | 176.8                                                 | 176.1(8)                                                                                              | 178.3(6)                                                                                            |

**Table S2.** Cell parameters reported in literature for ferric substituted salicylaldehyde-thiosemicarbazone complexes

| Compounds           | Cs <sub>2</sub> [Fe(Thsa) <sub>2</sub> ]<br>Ref S2 | Cs <sub>2</sub> [Fe(Thsa) <sub>2</sub> ]<br>Ref S2 | NH <sub>4</sub> [Fe(5BrThsa) <sub>2</sub> ]<br>Tabular crystals<br>Ref. S3 | NH <sub>4</sub> [Fe(5BrThsa) <sub>2</sub> ]<br>Mica-Like crystals<br>Ref. S3 | NH <sub>4</sub> [Fe(5ClThsa) <sub>2</sub> ]<br>Ref. S4 | NH <sub>4</sub> [Fe(5ClThsa) <sub>2</sub> ]<br>Ref. S4 | K[Fe(3,5Cl <sub>2</sub> Thsa) <sub>2</sub> ]<br>,1.5H <sub>2</sub> O<br>Ref S5 | K[Fe(3,5Cl <sub>2</sub> Thsa) <sub>2</sub> ]<br>,1.5H <sub>2</sub> O<br>Ref S5 | NH <sub>4</sub> [Fe(3,5Cl <sub>2</sub> Thsa) <sub>2</sub> ]<br>,1.5H <sub>2</sub> O<br>Ref S6 | NH <sub>4</sub> [Fe(3,5Cl <sub>2</sub> Thsa) <sub>2</sub> ]<br>,1.5H <sub>2</sub> O<br>Ref S6 |
|---------------------|----------------------------------------------------|----------------------------------------------------|----------------------------------------------------------------------------|------------------------------------------------------------------------------|--------------------------------------------------------|--------------------------------------------------------|--------------------------------------------------------------------------------|--------------------------------------------------------------------------------|-----------------------------------------------------------------------------------------------|-----------------------------------------------------------------------------------------------|
| T/K                 | 103 K                                              | 298 K                                              | 300 K                                                                      | 300 K                                                                        | 135 K                                                  | 298 K                                                  | 103 K                                                                          | 298 K                                                                          | 103 K                                                                                         | 298 K                                                                                         |
| System              | Orthorhombic                                       | Orthorhombic                                       | Orthorhombic                                                               | Orthorhombic                                                                 | Orthorhombic                                           | Orthorhombic                                           | Monoclinic                                                                     | Monoclinic                                                                     | Monoclinic                                                                                    | Monoclinic                                                                                    |
| Space group         | Pna21                                              | Pna21                                              | Pnca                                                                       | Pnca                                                                         | Pbcn                                                   | Pbcn                                                   | P2 <sub>1</sub> /a                                                             | P2 <sub>1</sub> /a                                                             | P2 <sub>1</sub> /a                                                                            | P2 <sub>1</sub> /a                                                                            |
| a (Å)               | 15.161(3)                                          | 15.285(3)                                          | 21.179(2)                                                                  | 20.837(8)                                                                    | 20.186(9)                                              | 20.348(9)                                              | 20.090(7)                                                                      | 20.221(8)                                                                      | 20.203(7)                                                                                     | 20.273(7)                                                                                     |
| b (Å)               | 13.340(3)                                          | 13.402(4)                                          | 11.755(7)                                                                  | 11.761(7)                                                                    | 11.729(8)                                              | 11.791(5)                                              | 26.996(10)                                                                     | 27.210(9)                                                                      | 27.117(9)                                                                                     | 27.437(9)                                                                                     |
| c (Å)               | 9.394(7)                                           | 9.449(8)                                           | 8.560(5)                                                                   | 8.619(6)                                                                     | 8.490(10)                                              | 8.548(4)                                               | 8.865(4)                                                                       | 8.916(5)                                                                       | 8.705(4)                                                                                      | 8.852(5)                                                                                      |
| β(°)                | -                                                  | -                                                  | -                                                                          | -                                                                            | -                                                      | -                                                      | 98.37                                                                          | 98.08                                                                          | 99.05(9)                                                                                      | 98.80(8)                                                                                      |
| V (Å <sup>3</sup> ) | 1900                                               | 1936                                               | 2131.1                                                                     | 2112.2                                                                       | 2010.1                                                 | 2050.9                                                 | 4666                                                                           | 4857                                                                           | 4710                                                                                          | 4866                                                                                          |

**References of Supplementary Data**

- S1. S. Floquet, Ph.D. Thesis, University Paris Sud, 2001.
- S2. N. A. Ryabova, V. I. Ponomarev, V. V. Zelentsov and L. O. Atovmyan, *Sov. Phys. Crystallogr. (Engl. Transl.)*, 1981, **26**, 53-57.
- S3. N. A. Ryabova, V. I. Ponomarev, V. V. Zelentsov, V. I. Shipilov and L. O. Atovmyan, *J. Struct. Chem. (Engl. Transl.)*, 1981, **22**, 234.
- S4. N. A. Ryabova, V. I. Ponomarev, L. O. Atovmyan, V. V. Zelentsov and V. I. Shipilov, *Sov. J. Coord. Chem. (Engl. Transl.)*, 1978, **4**, 95.
- S5. N. A. Ryabova, V. I. Ponomarev, V. V. Zelentsov and L. O. Atovmyan, *Sov. Phys. Crystallogr. (Engl. Transl.)*, 1982, **27**, 171-175.
- S6. N. A. Ryabova, V. I. Ponomarev, V. V. Zelentsov and L. O. Atovmyan, *Sov. Phys. Crystallogr. (Engl. Transl.)*, 1982, **27**, 46-52.
